# Supplementary material for: Adsorptive desulfurization with CPO-27/MOF-74: an experimental and computational investigation
Source: Royal Society of Chemistry journal article supplement (doi:10.1039/c5cp01063b), 2015-01-01
Supplement: c5cp01063b1.pdf [file c5cp01063b1.pdf]

## **Supporting Information.**

### **Adsorptive desulfurization with CPO-27/MOF-74: an experimental and computational investigation**

Ben Van de Voorde, Markéta Hezinová, Jeroen Lannoeye, Annelies Vandekerckhove, Bartosz Marszalek, Barbara Gil, Isabelle Beurroies, Petr Nachtigall and Dirk De Vos

#### **Details about the computational modelling**

##### **Basis sets**

The pseudopotential-based correlation-consistent valence- $X-\xi$  basis sets with polarization functions by Peterson et al.,<sup>1</sup> cc-pVXZ-PP, were employed for transition metal ions while Dunning's<sup>2</sup> correlation-consistent valence- $X-\xi$  basis sets with polarization functions, cc-pVXZ, were used for the other atoms.  $X$  stands for multiple basis functions describing valence atomic orbitals (valence double (D), triple (T), quadruple- $\xi$ , etc.). The corresponding augmented correlation-consistent valence- $X-\xi$  basis sets with polarization functions, aug-cc-pVZX-CC and aug-cc-pVXZ, were also used. The above-mentioned basis sets are abbreviated as VXZ, AVXZ for standard and augmented basis sets, respectively.

##### **Electronic structure of *cus* sites of CPO-27(X) and F<sub>2</sub>W(X)**

The theoretical description of adsorbate interactions with transition metal structures ( $\text{Cu}^{2+}$ ,  $\text{Co}^{2+}$  and  $\text{Ni}^{2+}$ ) in the CPO-27(X) framework is complicated due to (i) the possibility of multi-reference character of the wave function and (ii) spin coupling of unpaired electrons within the structure. The relative stability of a high-spin and low-spin states was evaluated for  $\text{Co}^{2+}$  and  $\text{Ni}^{2+}$  for F<sub>2</sub>W(X) cluster models and F<sub>2</sub>W(X)-S complexes at the multi-reference CASPT2/VTZ level, using geometries of F<sub>2</sub>W(X) clusters optimized in a high-spin electronic configuration. The high-spin electronic configuration (Triplet for  $\text{Ni}^{2+}$  and Quadruplet for  $\text{Co}^{2+}$ ) is preferred for both; the energetic splitting is 163 kJ mol<sup>-1</sup> and 179 kJ mol<sup>-1</sup> for

$F_2W(Ni)$  and  $F_2W(Ni)-S$  and  $155\text{ kJ mol}^{-1}$  and  $156\text{ kJ mol}^{-1}$  for  $F_2W(Co)$  and  $F_2W(Co)-S$ . Therefore, the high-spin electronic configuration, which can be described with just a single-reference wavefunction, is employed on each  $X^{2+}$  ion in all the following calculations.

The spin coupling between  $Cu^{2+}$  ions with an unpaired electron in the CPO-27(Cu) framework can be either ferromagnetic (high-spin configuration, whereby spins on every  $Cu^{2+}$  are aligned in the parallel way) or antiferromagnetic (low-spin configuration, whereby spins on every  $Cu^{2+}$  are aligned in the antiparallel way). The calculated interaction energies for CPO-27(Cu) were  $-56.9\text{ kJ mol}^{-1}$  for both high-spin/low-spin electron configurations and  $-56.8\text{ kJ mol}^{-1}$  for the closed-shell solution, which does not consider spin-polarization. Therefore, the high-spin configuration on the  $X^{2+}$  ions describes well the proposed CPO-27(X) models, and will be used for all calculations.

### **CCSD(T)/CBS with AVTZ/AVQZ extrapolation scheme**

The accuracy of CCSD(T)/CBS results with AVTZ/AVDZ extrapolation scheme was verified with higher-level AVTZ/AVQZ extrapolation for  $F_2W(Mg)$  and  $F_2W(Zn)$  models containing metal ions with closed-shell electronic structure. The CCSD(T) interaction energies for the  $F_2W(Zn)$  model are  $-12.5\text{ kJ mol}^{-1}$  and  $-12.7\text{ kJ mol}^{-1}$  for AVDZ/AVTZ and AVTZ/AVQZ extrapolation scheme, respectively. The interaction energies for  $F_2W(Mg)$  model are  $-13.9\text{ kJ mol}^{-1}$  and  $-14.2\text{ kJ mol}^{-1}$  for AVDZ/AVTZ and AVTZ/AVQZ extrapolation scheme, respectively. The energy difference between CCSD(T)/CBS results extrapolated to lower/higher-order basis sets is less than  $0.3\text{ kJ mol}^{-1}$ . Thus, the CCSD(T)/CBS results obtained with AVDZ/AVTZ basis sets can serve as the benchmark calculations which can be used to evaluate the accuracy of other methods.

## Additional figures and tables

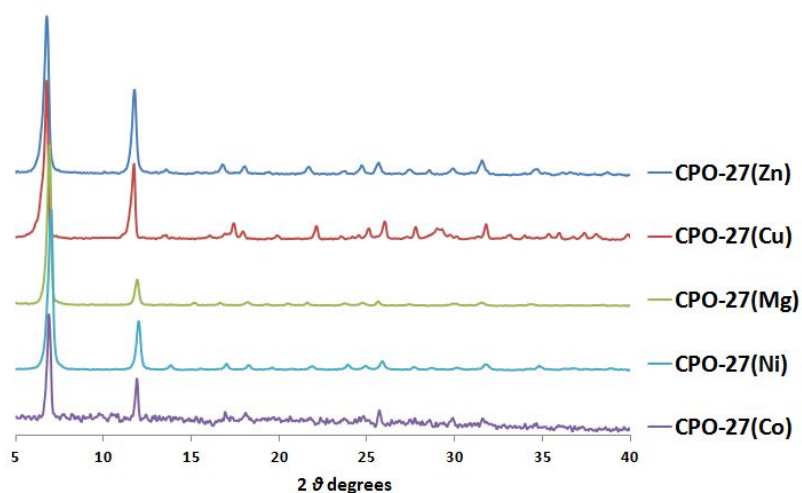

**Figure S1.** XRD patterns of the synthesized CPO-27 samples

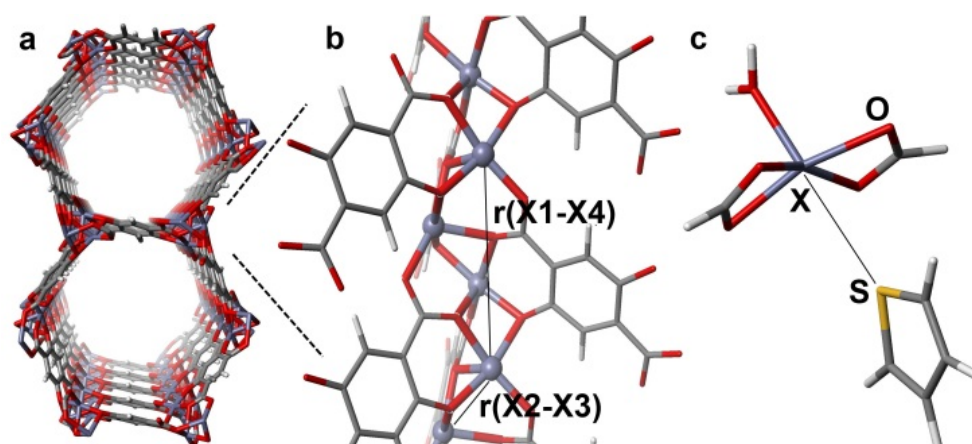

**Figure S2.** (a) Unit cell of CPO-27(X) viewed along the one-dimensional channel; (b) Detail of a helical chain of CPO-27(X) formed by *cis*-oriented DHBDC organic linkers connected to the *cus* sites of the metal  $X^{2+}$  ions;  $r(X2-X3)$  denotes the distance between adjacent *cus* centres and  $r(X1-X4)$  is the distance between the two closest metal ions along *c* accessible from the same channel. (c) The cluster model denoted  $F_2W(X)-S$ . X, O and S atoms are depicted in blue, red, and yellow, respectively.

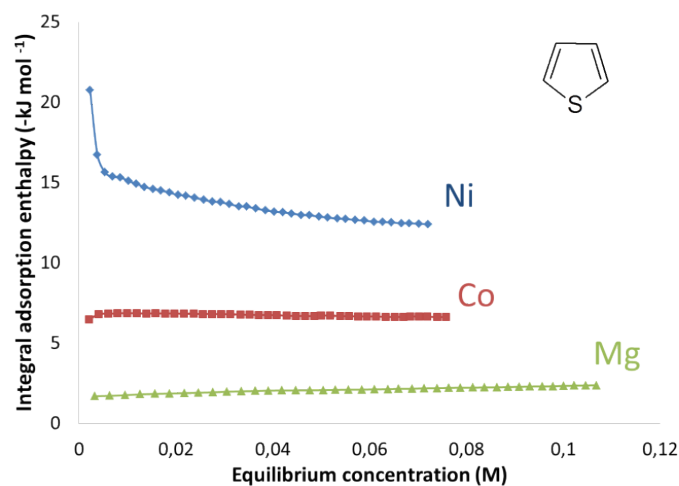

**Figure S3.** Integral adsorption enthalpies  $\Delta H$  ( $-\text{kJ mol}^{-1}$ ) of thiophene as a function of equilibrium concentration ( $\text{mol L}^{-1}$ ) for CPO-27(Ni,Co,Mg).

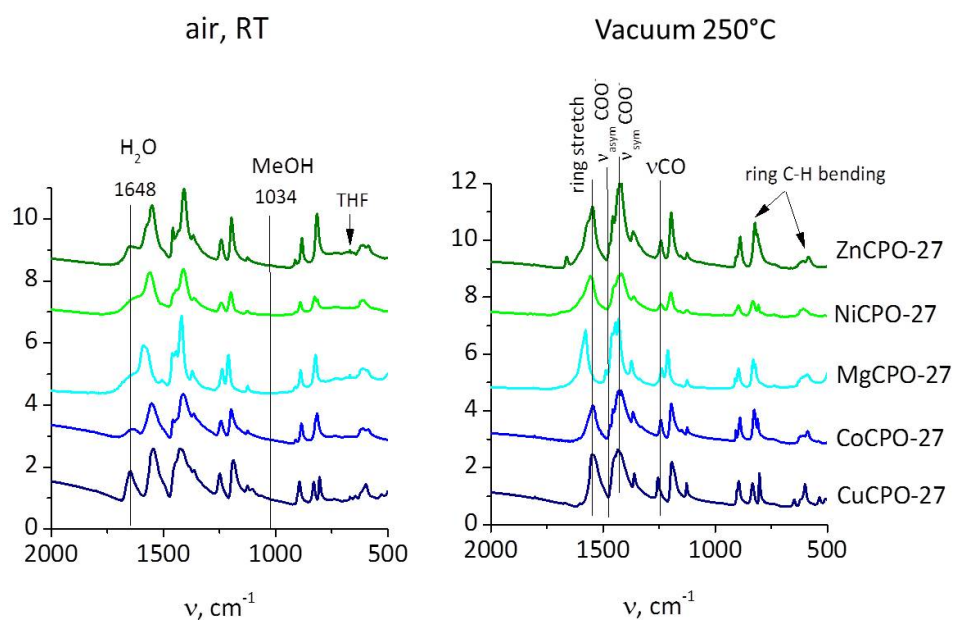

**Figure S4.** IR spectra of CPO-27 materials at room temperature in air (left) and under vacuum at 250 C (right).

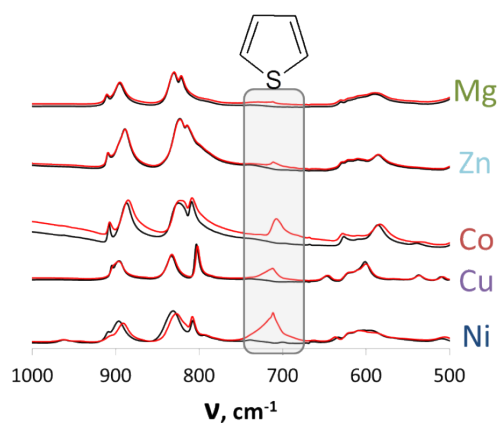

**Figure S5.** Normalized FTIR spectra at room temperature of an empty framework (black lines) and after adsorption of thiophene (red lines) from the vapour phase (80 mbar) monitoring a complex thiophene interaction band between 730-680  $\text{cm}^{-1}$ .

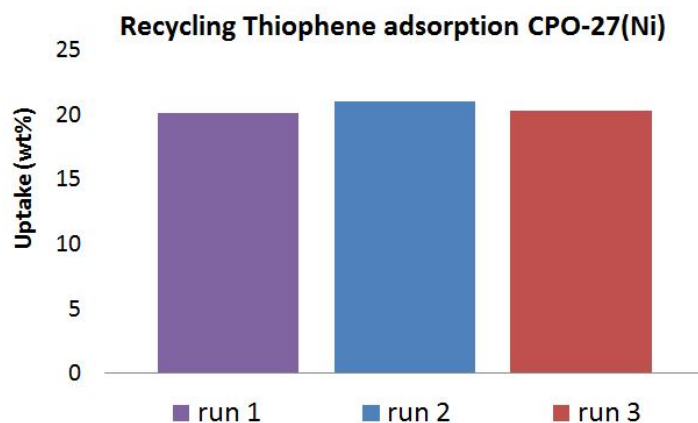

**Figure S6.** Consecutive adsorption runs for a 0.3M solution of thiophene from heptane:toluene (80:20) on CPO-27(Ni)

**Table S1.** Affinities of the CPO-27 series of materials for sulfur compounds in  $\text{L mol}^{-1}$ .

| $\text{L mol}^{-1}$ | <b>TPH</b> | <b>BT</b> | <b>DBT</b> | <b>DMDBT</b> |
|---------------------|------------|-----------|------------|--------------|
| <b>CPO-27(Ni)</b>   | 290        | 27000     | 290000     | 1000         |
| <b>CPO-27(Co)</b>   | 100        | 3700      | 150000     | 650          |
| <b>CPO-27(Mg)</b>   | 64         | 560       | 11000      | 160          |
| <b>CPO-27(Cu)</b>   | 15         | 400       | 1400       | 530          |
| <b>CPO-27(Zn)</b>   | 18         | 130       | 530        | 20           |

**Table S2.** Interaction energies of thiophene with F<sub>2</sub>W(X) cluster models<sup>a</sup> calculated at various levels of theory.

| F <sub>2</sub> W(X) | $\Delta E_{\text{int}}$ |       |       |       |                  |       | $r(\text{XS})^{\text{b}}$ |       |
|---------------------|-------------------------|-------|-------|-------|------------------|-------|---------------------------|-------|
|                     | CCSD(T)                 | MP2   |       | PBE   |                  | B3LYP | vdW                       | PBE   |
|                     | CBS                     | VTZ   | CBS   | VTZ   | PAW <sup>c</sup> | VTZ   | PAW <sup>c</sup>          | VTZ   |
| Cu                  | -11.3                   | -9.2  | -11.9 | -2.8  | -3.1             | 0.2   | -11.4                     | 3.544 |
| Zn                  | -12.5                   | -9.6  | -13.1 | -3.1  | -3.4             | 0.7   | -13.1                     | 3.517 |
| Mg                  | -13.9                   | -11.4 | -14.8 | -4.2  | -4.4             | 0.6   | -13.9                     | 3.327 |
| Co                  | -17.7                   | -11.7 | -19.0 | -6.6  | -7.8             | 7.1   | -17.6                     | 2.847 |
| Ni                  | -17.0                   | -6.8  | -17.7 | -14.7 | -17.1            | 4.1   | -22.7                     | 2.489 |

<sup>a</sup> In kJ mol<sup>-1</sup>; all energies corrected for BSSE. <sup>b</sup> X<sup>2+</sup>-S distance in Å, <sup>c</sup> Energy cut-off 600 eV

## REFERENCES

1. K. Peterson and C. Puzzarini, *Theor. Chem. Acc.*, 2005, **114**, 283–296.
2. T. H. Dunning, *J. Chem. Phys.*, 1989, **90**, 1007.
